# Supplementary material
Source: PubMed Central journal article supplement (PMC2680424)
Supplement: NIHMS106144-supplement-SupplMater.pdf [file NIHMS106144-supplement-SupplMater.pdf]

## Supplementary Table. Studies Examining the Impact of Antidepressant Treatment on the Inflammatory Response

| Author                                | Population                                                             | Treatment                                                     | Treatment Duration            | Immune Biomarker                                                         | Result                                                                                                                                                                                                              |
|---------------------------------------|------------------------------------------------------------------------|---------------------------------------------------------------|-------------------------------|--------------------------------------------------------------------------|---------------------------------------------------------------------------------------------------------------------------------------------------------------------------------------------------------------------|
| Maes <i>et al.</i> 1995 (118)         | Inpatient Major Depression (n=17)                                      | Fluoxetine (n=9)<br>TCA (n=8)                                 | Mean ~12 weeks                | Plasma IL-6, sIL-6R, sIL-2R, TFR                                         | Antidepressant treatment had no effect on immune biomarkers.                                                                                                                                                        |
| Sluzewska <i>et al.</i> 1995 (119)    | Inpatient Major Depression (n=22)                                      | Fluoxetine                                                    | 8 weeks                       | Serum IL-6, AGP and CRP                                                  | IL-6 decreased in those with elevated IL-6 concentrations at baseline. AGP concentrations also decreased.                                                                                                           |
| Maes <i>et al.</i> 1997 (120)         | Major Depression (n=25)                                                | Trazodone alone or in combination with Pindolol or Fluoxetine | 5 weeks                       | Serum IL-6, sIL-6R, IL-1ra, CC16, sCD8                                   | sIL-6R significantly decreased with antidepressant treatment. No differences between responders and non-responders were found.                                                                                      |
| Sluzewska <i>et al.</i> 1997 (108)    | Refractory Depression (n=32), Controls (n=20)                          | Lithium potentiation of antidepressant therapy                | 4 weeks                       | Plasma APPs including CRP                                                | APP decreased in lithium-treated subjects. Baseline APPs were increased in non-responders.                                                                                                                          |
| Hinze-Seich <i>et al.</i> 2000 (121)  | Inpatient Major Depression (n=22) and Inpatient Other Diagnoses (n=14) | TCA (n=12), paroxetine (n=10), no medication (n=14)           | 6 weeks                       | Plasma TNF-alpha and TNF soluble receptors                               | sTNFR2 increased with TCA therapy, and was associated with increased BMI. There was no change in TNF-alpha.                                                                                                         |
| Kubera <i>et al.</i> 2000 (122)       | Major depression (n=9), Controls (n=11)                                | Antidepressants (not specified)                               | 6 weeks                       | Serum IL-6, IL-1ra and IL-10                                             | Antidepressant treatment had no effect on serum cytokines.                                                                                                                                                          |
| Lanquillon <i>et al.</i> 2000 (107)   | Inpatient Major Depression (n=24)                                      | Amitriptyline                                                 | 6 weeks                       | Unstimulated blood production of IL-6 and TNF-alpha, CRP                 | TNF-alpha decreased in responders. Non-responders exhibited increased baseline IL-6. Baseline CRP was elevated in major depression patients versus controls.                                                        |
| Kagaya <i>et al.</i> 2001(123)        | Major Depression and Dysthymia (n=12), Controls (n=12)                 | Multiple Antidepressants                                      | 4 weeks                       | Plasma IL-1 beta, IL-6, sIL-2R, TNF-alpha                                | TNF-alpha increased following treatment in 8 patients.                                                                                                                                                              |
| Kraus <i>et al.</i> 2002 (124)        | Major Depression (n=20)                                                | Mirtazapine (n=11), Venlafaxine (n=9)                         | 4 weeks                       | Plasma TNF-alpha and TNF soluble receptors                               | TNF-alpha and its soluble receptors increased with mirtazapine in association with increased BMI. Venlafaxine had no effect on immune measures.                                                                     |
| Tuglu <i>et al.</i> 2003 (125)        | Inpatient Major Depression (n=26), Controls (n=17)                     | Multiple SSRIs                                                | 6 weeks                       | Serum TNF-alpha and CRP                                                  | TNF-alpha decreased during treatment to levels comparable to controls. CRP decreased in antidepressant treated subjects.                                                                                            |
| Basterzi <i>et al.</i> 2005 (126)     | Major Depression (n=23), Controls (n=23)                               | Multiple SSRIs                                                | 6 weeks                       | Serum IL-6                                                               | Antidepressants reduced IL-6 in patients below baseline levels of patients and controls. Baseline IL-6 levels were somewhat higher in patients versus controls but not significantly.                               |
| O'Brien <i>et al.</i> 2006 (127)      | Major Depression with melancholic features (n=20, all women)           | Multiple SSRIs                                                | 3 weeks                       | Serum CRP                                                                | CRP concentrations decreased following antidepressant treatment irrespective of response.                                                                                                                           |
| Narita <i>et al.</i> 2006 (128)       | Remitted Depression (n=21), Controls (n=20)                            | Multiple SSRIs or SNRI                                        | Maintenance (mean ~18 months) | Plasma TNF-alpha                                                         | TNF-alpha was lower in patients versus controls.                                                                                                                                                                    |
| Himmerich <i>et al.</i> 2006 (129)    | Affective Spectrum Disorder (n=70)                                     | Multiple medications prior to and during admission            | Mean ~11 weeks                | Plasma TNF-alpha and TNF soluble receptors                               | TNF-alpha soluble receptors increased during hospitalization. No change in TNF-alpha. Patients exhibited reduced depressive symptoms upon discharge compared to admission.                                          |
| Marques-Deak <i>et al.</i> 2007 (130) | Major Depression (n=27, all women)                                     | Imipramine (n=12) or sertraline (n=15)                        | 3 months to 1 year            | LPS-stimulated IL-1 beta, IL-6 and IFN-gamma                             | All cytokines increased after treatment.                                                                                                                                                                            |
| Kim <i>et al.</i> 2007 (131)          | Inpatient Major Depression (n=32)                                      | Multiple antidepressants                                      | 6 weeks                       | LPS- and PHA-stimulated IL-6, TNF-alpha, IFN-gamma, IL-2, IL-4, TGF-beta | IL-6, IL-2 and TGF-beta were decreased following treatment.                                                                                                                                                         |
| Eller <i>et al.</i> 2007 (132)        | Major Depression (n=100), Controls (n=45)                              | Escitalopram                                                  | 12 weeks                      | Serum TNF-alpha, sIL-2R, IL-8                                            | sIL-2R decreased with treatment. TNF-alpha was higher in non-responders.                                                                                                                                            |
| Sutcgil <i>et al.</i> 2007 (133)      | Major Depression (n=23), Controls (n=25)                               | Sertraline                                                    | 8 weeks                       | Serum IL-2, IL-4, IL-12, MCP-1, TGF-beta, TNF-alpha,                     | IL-2, IL-12, MCP-1 and TNF-alpha were higher and IL-4 and TGF-beta were lower in patients versus controls at baseline. IL-2, IL-12, MCP-1, and TNF-alpha decreased and IL-4 and TGF-beta increased after treatment. |

|                                    |                                                                        |                             |          |                                                      |                                                                                                                                                                                                                                                   |
|------------------------------------|------------------------------------------------------------------------|-----------------------------|----------|------------------------------------------------------|---------------------------------------------------------------------------------------------------------------------------------------------------------------------------------------------------------------------------------------------------|
| Hernandez <i>et al.</i> 2008 (134) | Major Depression (n=31), Controls (n=22)                               | Multiple SSRIs              | 52 weeks | Serum IL-1 beta, IL-2, IL-4, IL-10, IL-13, IFN-gamma | IL-10 and IL-13 were higher and IL-2, IL-1 beta, and IFN-gamma were lower in depressive versus controls. IL-1 beta, IL-2, IL-4, and IFN-gamma increased and IL-10 and IL-13 decreased after 52 weeks of treatment (n=10 at the end of the study). |
| Eller <i>et al.</i> 2008 (135)     | Major Depression (n=28 non-responders to escitalopram) Controls (n=45) | Escitalopram plus Bupropion | 6 weeks  | Serum TNF-alpha, sIL-2R, IL-8                        | IL-8 increased during adjunctive bupropion treatment in responders and non-responders.                                                                                                                                                            |

AGP: alpha 1 acid glycoprotein; APP: acute phase proteins; BMI: body mass index; CC16: Clara cell protein; CRP: C-reactive protein; IFN: interferon; IL: interleukin; IL-1ra: IL-1 receptor antagonist; LPS: lipopolysaccharide; MCP-1: monocyte chemoattractant protein-1; PHA: phytohemagglutinin; sCD8: soluble cluster of differentiation 8; sIL-2R: soluble IL-2 receptor; sIL-6R: soluble IL-6 receptor; SNRI: serotonin norepinephrine re-uptake inhibitor; SSRI: selective serotonin reuptake inhibitor; sTNFR2: soluble TNF-alpha receptor 2; TCA: tricyclic antidepressant; TGF: transforming growth factor; TfR: transferrin receptor; TNF: tumor necrosis factor

## Supplementary References

107. Lanquillon S, Krieg JC, Bening-Abu-Shach U, Vedder H (2000): Cytokine production and treatment response in major depressive disorder. *Neuropsychopharmacol* 22: 370-379.
108. Sluzewska A, Sobieska M, Rybakowski JK (1997): Changes in acute-phase proteins during lithium potentiation of antidepressants in refractory depression. *Neuropsychobiol* 35: 123-127.
118. Maes M, Meltzer HY, Bosmans E, Bergmans R, Vandoolaeghe E, Ranjan R, *et al.* (1995): Increased plasma concentrations of interleukin-6, soluble interleukin-6, soluble interleukin-2 and transferrin receptor in major depression. *J Affect Disord* 34: 301-309.
119. Sluzewska A, Rybakowski J, Laciak M, Mackiewicz A, Sobieska M, Wiktorowicz K (1995): Interleukin-6 serum levels in depressed patients before and after treatment with fluoxetine. *Ann NY Acad Sci* 762: 474-476.
120. Maes M, Westenberg H, Vandoolaeghe E, Demedts P, Wauters A, Neels H, *et al.* (1997): Effects of trazodone and fluoxetine in the treatment of major depression: therapeutic pharmacokinetic and pharmacodynamic interactions through formation of meta-chlorophenylpiperazine. *J Clin Psychopharmacol* 17: 358-364.
121. Hinze-Selch D, Schuld A, Kraus T, Kuhn M, Uhr M, Haack M, *et al.* (2000): Effects of antidepressants on weight and on the plasma levels of leptin, TNF-alpha and soluble TNF receptors: A longitudinal study in patients treated with amitriptyline or paroxetine. *Neuropsychopharmacol* 23: 13-19.
122. Kubera M, Kenis G, Bosmans E, Zieba A, Dudek D, Nowak G, *et al.* (2000): Plasma levels of interleukin-6, interleukin-10, and interleukin-1 receptor antagonist in depression: comparison between the acute state and after remission. *Pol J Pharmacol* 52: 237-241.
123. Kagaya A, Kugaya A, Takebayashi M, Fukue-Saeki M, Saeki T, Yamawaki S, *et al.* (2001): Plasma concentrations of interleukin-1beta, interleukin-6, soluble interleukin-2 receptor and tumor necrosis factor alpha of depressed patients in Japan. *Neuropsychobiol* 43: 59-62.
124. Kraus T, Haack M, Schuld A, Hinze-Selch D, Koethe D, Pollmacher T (2002): Body weight, the tumor necrosis factor system, and leptin production during treatment with mirtazapine or venlafaxine. *Pharmacopsychiatry* 35: 220-225.

125. Tuglu C, Kara SH, Caliyurt O, Vardar E, Abay E (2003): Increased serum tumor necrosis factor-alpha levels and treatment response in major depressive disorder. *Psychopharmacol (Berl)* 170: 429-433.
126. Basterzi AD, Aydemir C, Kisa C, Aksaray S, Tuzer V, Yazici K, *et al.* (2005): IL-6 levels decrease with SSRI treatment in patients with major depression. *Hum Psychopharmacol* 20: 473-476.
127. O'Brien SM, Scott LV, Dinan TG (2006): Antidepressant therapy and C-reactive protein levels. *Br J Psychiatry* 188: 449-452.
128. Narita K, Murata T, Takahashi T, Kosaka H, Omata N, Wada Y (2006): Plasma levels of adiponectin and tumor necrosis factor-alpha in patients with remitted major depression receiving long-term maintenance antidepressant therapy. *Progr Neuropsychopharmacol Biol Psychiatry* 30: 1159-1162.
129. Himmerich H, Binder EB, Kunzel HE, Schuld A, Lucae S, Uhr M, *et al.* (2006): Successful antidepressant therapy restores the disturbed interplay between TNF-alpha system and HPA axis. *Biol Psychiatry* 60: 882-888.
130. Marques-Deak AH, Neto FL, Dominguez WV, Solis AC, Kurcgant D, Sato F, *et al.* (2007): Cytokine profiles in women with different subtypes of major depressive disorder. *J Psychiatr Res* 41: 152-159.
131. Kim YK, Na KS, Shin KH, Jung HY, Choi SH, Kim JB (2007): Cytokine imbalance in the pathophysiology of major depressive disorder. *Prog Neuropsychopharmacol Biol Psychiatry* 31: 1044-1053.
132. Eller T, Vasar V, Shlik J, Maron E (2008): Pro-inflammatory cytokines and treatment response to escitalopram in major depressive disorder. *Prog Neuropsychopharmacol Biol Psychiatry* 32: 445-450.
133. Sutçigil L, Oktenli C, Musabak U, Bozkurt A, Cansever A, Uzun O, *et al.* (2007): Pro- and anti-inflammatory cytokine balance in major depression: effect of sertraline therapy. *Clin Dev Immunol* 2007: 76396.
134. Hernandez ME, Mendieta D, Martinez-Fong D, Loria F, Moreno J, Estrada I, *et al.* (2008): Variations in circulating cytokine levels during 52 week course of treatment with SSRI for major depressive disorder. *Eur Neuropsychopharmacol* 18(12):917-24.

135. Eller T, Vasar V, Shlik J, Maron E (2008): Effects of bupropion augmentation on pro-inflammatory cytokines in escitalopram-resistant patients with major depressive disorder. *J Psychopharmacol* [published online ahead of print Jun 18].
